# Supplementary material
Source: HighWire-hosted journal article supplement (http://www.qdcxjkg.com/highwire/filestream/113919/field_highwire_adjunct_files/0/ERJ-02055-2012_Disclosures.pdf)
Supplement: ERJ-02055-2012_Disclosures.pdf [file ERJ-02055-2012_Disclosures.pdf]

**R. Diel** received travel reimbursement and/or a fee for speaking at symposia sponsored by Cellestis Ltd., Oxford Immunotec Ltd. and Pharmore Ltd. (exclusive supplier of Tuberculin RT 23 for Germany).

**L. Reichman** has received fees as a consultant for Cellestis Qiagen (manufacturer of Quantiferon).

J\_P. Zellweger has received fees as consultant for Cellestis Qiagen (manufacturer of Quantiferon).
